# Supplementary material for: Improving viral load testing using a quality improvement approach in Blantyre, Malawi
Source: PLoS One. 2022 Jun 8;17(6):e0269062. doi: 10.1371/journal.pone.0269062 (PMC9176770; doi:10.1371/journal.pone.0269062)
Supplement: S1 Dataset — (XLS) [file pone.0269062.s001.xls]

## Sheet: Sheet1
No.	age	sex	didpatientreceivetestyesno	week	duplicates	age3
1	11	m	no	1	0	10-14 years
2	27	f	yes	1	0	25-29 years
3	37	f	no	1	0	35 and above
4	35	f	yes	1	0	35 and above
5	40	f	yes	1	0	35 and above
6	32	f	yes	1	0	30-34 years
7	38	f	no	1	0	35 and above
8	36	f	no	1	0	35 and above
9	21	f	yes	1	0	18-24 years
10	31	f	yes	1	0	30-34 years
11	36	f	no	1	1	35 and above
12	27	f	no	1	2	25-29 years
13	36	f	yes	1	0	35 and above
14	23	f	yes	1	0	18-24 years
15	9	f	no	1	1	5-9 years
16	23	f	no	1	0	18-24 years
17	36	f	yes	1	0	35 and above
18	6	m	no	1	2	5-9 years
19	4	m	no	1	0	0-4 years
20	36	f	no	1	1	35 and above
21	6	f	no	1	0	5-9 years
22	3	m	yes	1	0	0-4 years
23	30	f	no	2	1	30-34 years
24	25	f	yes	2	0	25-29 years
25	6	m	no	2	0	5-9 years
26	21	f	yes	2	0	18-24 years
27	30	f	no	2	0	30-34 years
28	24	f	no	2	0	18-24 years
29	30	f	yes	2	0	30-34 years
30	22	f	no	2	0	18-24 years
31	31	f	yes	2	0	30-34 years
32	37	f	yes	2	0	35 and above
33	1	f	no	2	0	0-4 years
34	20	f	yes	2	0	18-24 years
35	34	f	no	2	1	30-34 years
36	30	f	no	2	1	30-34 years
37	30	f	no	2	0	30-34 years
38	24	f	yes	2	1	18-24 years
39	22	f	no	2	1	18-24 years
40	29	f	yes	2	0	25-29 years
41	40	f	yes	2	0	35 and above
42	27	f	yes	2	0	25-29 years
43	30	f	no	2	2	30-34 years
44	35	f	no	2	1	35 and above
45	25	f	yes	2	0	25-29 years
46	8	m	no	2	0	5-9 years
47	6	f	no	2	0	5-9 years
48	37	f	no	2	0	35 and above
49	23	f	no	2	0	18-24 years
50	11	m	yes	2	0	10-14 years
51	31	f	yes	2	0	30-34 years
52	15	m	yes	2	0	15-17 years
53	7	f	no	2	0	5-9 years
54	41	f	yes	2	0	35 and above
55	9	m	no	2	0	5-9 years
56	40	f	no	2	1	35 and above
57	29	f	no	2	0	25-29 years
58	36	f	yes	2	1	35 and above
59	10	m	no	3	0	10-14 years
60	10	m	no	3	1	10-14 years
61	22	f	no	3	0	18-24 years
62	7	f	no	3	0	5-9 years
63	4	f	no	3	0	0-4 years
64	42	f	no	3	0	35 and above
65	38	f	no	3	0	35 and above
66	38	f	no	3	0	35 and above
67	31	f	no	3	0	30-34 years
68	7	m	no	3	1	5-9 years
69	8	f	no	3	0	5-9 years
70	6	m	no	3	0	5-9 years
71	10	f	no	3	0	10-14 years
72	4	f	no	3	0	0-4 years
73	30	f	yes	3	0	30-34 years
74	15	m	no	3	1	15-17 years
75	31	f	yes	3	0	30-34 years
76	31	f	no	3	0	30-34 years
77	36	f	no	3	0	35 and above
78	19	f	no	3	0	18-24 years
79	12	m	no	3	0	10-14 years
80	5	f	no	3	0	5-9 years
81	21	f	no	3	0	18-24 years
82	35	f	no	3	1	35 and above
83	27	f	no	3	0	25-29 years
84	31	f	yes	3	0	30-34 years
85	37	f	no	4	1	35 and above
86	32	f	yes	4	0	30-34 years
87	24	f	no	4	0	18-24 years
88	8	m	no	4	0	5-9 years
89	34	f	no	4	0	30-34 years
90	33	f	no	4	1	30-34 years
91	30	f	no	4	2	30-34 years
92	31	f	no	4	0	30-34 years
93	25	f	no	4	1	25-29 years
94	30	f	yes	4	0	30-34 years
95	10	m	no	4	0	10-14 years
96	6	m	no	4	2	5-9 years
97	6	f	no	4	0	5-9 years
98	29	f	yes	4	0	25-29 years
99	15	f	no	4	0	15-17 years
100	25	f	yes	4	1	25-29 years
101	16	f	no	4	0	15-17 years
102	33	f	no	4	0	30-34 years
103	11	f	no	4	0	10-14 years
104	10	m	no	4	1	10-14 years
105	32	f	no	4	1	30-34 years
106	39	f	no	4	1	35 and above
107	17	m	no	4	0	15-17 years
108	37	f	no	4	1	35 and above
109	46	f	no	4	0	35 and above
110	30	f	no	4	1	30-34 years
111	26	f	no	4	1	25-29 years
112	21	f	yes	4	0	18-24 years
113	8	f	no	4	0	5-9 years
114	8	f	no	4	0	5-9 years
115	9	m	no	4	0	5-9 years
116	37	f	yes	4	0	35 and above
117	27	f	no	4	2	25-29 years
118	25	f	yes	4	0	25-29 years
119	33	f	no	4	0	30-34 years
120	17	m	no	4	0	15-17 years
121	31	f	yes	4	0	30-34 years
122	21	f	no	4	0	18-24 years
123	21	f	yes	4	0	18-24 years
124	13	m	no	4	0	10-14 years
125	10	f	yes	4	0	10-14 years
126	17	f	no	4	1	15-17 years
127	34	f	no	4	1	30-34 years
128	18	m	no	4	0	18-24 years
129	25	f	yes	4	0	25-29 years
130	28	f	no	4	0	25-29 years
131	32	f	no	4	1	30-34 years
132	39	f	no	4	0	35 and above
133	13	f	no	4	0	10-14 years
134	24	f	no	4	0	18-24 years
135	25	f	no	4	0	25-29 years
136	10	m	no	4	1	10-14 years
137	22	f	no	4	0	18-24 years
138	33	f	no	4	0	30-34 years
139	25	f	yes	4	0	25-29 years
140	33	f	no	4	1	30-34 years
141	17	f	no	4	0	15-17 years
142	8	m	no	4	0	5-9 years
143	33	f	no	4	2	30-34 years
144	34	f	no	4	0	30-34 years
145	18	f	no	4	0	18-24 years
146	15	m	no	4	0	15-17 years
147	32	f	no	4	1	30-34 years
148	20	f	no	4	1	18-24 years
149	6	m	no	4	2	5-9 years
150	33	f	yes	4	1	30-34 years
151	10	m	yes	5	0	10-14 years
152	14	m	yes	5	0	10-14 years
153	11	m	yes	5	0	10-14 years
154	17	m	no	5	0	15-17 years
155	6	f	no	5	0	5-9 years
156	26	f	yes	5	0	25-29 years
157	3	f	no	5	0	0-4 years
158	28	f	no	5	0	25-29 years
159	23	f	yes	5	1	18-24 years
160	27	f	yes	5	0	25-29 years
161	34	f	no	5	0	30-34 years
162	23	f	yes	5	0	18-24 years
163	36	f	yes	5	0	35 and above
164	5	m	no	5	1	5-9 years
165	36	f	no	5	0	35 and above
166	26	f	yes	5	0	25-29 years
167	50	f	yes	5	0	35 and above
168	25	f	no	5	0	25-29 years
169	32	f	yes	5	0	30-34 years
170	12	m	no	5	0	10-14 years
171	5	f	no	5	1	5-9 years
172	34	f	no	5	0	30-34 years
173	34	f	no	6	0	30-34 years
174	12	m	no	6	1	10-14 years
175	25	f	no	6	0	25-29 years
176	41	f	no	6	0	35 and above
177	35	f	no	6	1	35 and above
178	38	f	yes	6	0	35 and above
179	10	f	no	6	0	10-14 years
180	34	f	no	6	0	30-34 years
181	27	m	yes	6	0	25-29 years
182	35	f	no	6	0	35 and above
183	30	f	yes	6	0	30-34 years
184	40	f	yes	6	0	35 and above
185	11	m	no	6	0	10-14 years
186	28	f	no	6	0	25-29 years
187	23	f	yes	6	0	18-24 years
188	7	f	no	6	0	5-9 years
189	28	f	yes	6	0	25-29 years
190	3	f	no	6	1	0-4 years
191	38	f	no	6	0	35 and above
192	27	f	no	6	0	25-29 years
193	35	f	no	6	0	35 and above
194	35	f	no	6	0	35 and above
195	27	f	no	6	0	25-29 years
196	38	f	yes	6	0	35 and above
197	50	f	yes	6	0	35 and above
198	27	f	no	6	2	25-29 years
199	31	f	no	6	1	30-34 years
200	34	f	no	7	1	30-34 years
201	27	f	no	7	0	25-29 years
202	14	m	no	7	0	10-14 years
203	28	f	no	7	0	25-29 years
204	24	f	no	7	0	18-24 years
205	38	f	no	7	0	35 and above
206	25	f	no	7	0	25-29 years
207	31	f	no	7	0	30-34 years
208	32	f	no	7	1	30-34 years
209	28	f	no	7	0	25-29 years
210	42	f	yes	7	0	35 and above
211	25	f	yes	7	0	25-29 years
212	29	f	yes	7	0	25-29 years
213	41	f	no	7	0	35 and above
214	24	f	no	7	0	18-24 years
215	21	f	yes	7	0	18-24 years
216	33	f	no	7	0	30-34 years
217	28	f	no	7	0	25-29 years
218	26	f	yes	7	0	25-29 years
219	22	f	no	7	1	18-24 years
220	3	f	no	7	0	0-4 years
221	4	f	yes	7	1	0-4 years
222	32	f	no	8	1	30-34 years
223	34	f	no	8	1	30-34 years
224	34	f	no	8	1	30-34 years
225	33	f	no	8	2	30-34 years
226	21	f	no	8	0	18-24 years
227	16	m	yes	8	0	15-17 years
228	2	m	yes	8	0	0-4 years
229	39	f	no	8	0	35 and above
230	34	f	no	8	1	30-34 years
231	30	f	no	8	2	30-34 years
232	27	f	no	8	1	25-29 years
233	27	f	no	8	0	25-29 years
234	7	m	no	8	1	5-9 years
235	18	f	no	8	1	18-24 years
236	40	f	no	8	0	35 and above
237	6	m	no	8	0	5-9 years
238	22	f	no	8	0	18-24 years
239	23	f	no	8	0	18-24 years
240	7	m	no	8	0	5-9 years
241	8	m	no	8	0	5-9 years
242	37	f	no	8	2	35 and above
243	8	m	no	8	0	5-9 years
244	6	f	no	8	0	5-9 years
245	35	f	no	8	0	35 and above
246	2	m	no	8	0	0-4 years
247	10	m	no	8	0	10-14 years
248	16	f	no	8	0	15-17 years
249	7	m	no	8	1	5-9 years
250	43	f	yes	8	0	35 and above
251	6	m	no	8	2	5-9 years
252	37	f	no	8	0	35 and above
253	8	f	no	8	1	5-9 years
254	5	m	no	8	0	5-9 years
255	27	f	no	8	0	25-29 years
256	39	f	no	8	1	35 and above
257	37	f	no	8	1	35 and above
258	37	f	no	9	0	35 and above
259	28	f	yes	9	0	25-29 years
260	11	m	yes	9	0	10-14 years
261	12	m	yes	9	1	10-14 years
262	32	f	yes	9	1	30-34 years
263	21	f	no	9	1	18-24 years
264	38	f	no	9	0	35 and above
265	35	f	no	9	0	35 and above
266	27	f	no	9	0	25-29 years
267	36	f	yes	9	0	35 and above
268	35	f	yes	9	0	35 and above
269	30	f	no	9	1	30-34 years
270	9	m	no	9	0	5-9 years
271	27	f	yes	9	0	25-29 years
272	41	f	no	9	0	35 and above
273	27	f	no	9	0	25-29 years
274	5	m	no	9	0	5-9 years
275	24	f	no	9	0	18-24 years
276	35	f	no	9	0	35 and above
277	25	f	yes	10	0	25-29 years
278	8	m	no	10	0	5-9 years
279	7	f	no	10	0	5-9 years
280	32	f	no	10	1	30-34 years
281	36	f	yes	10	0	35 and above
282	25	f	no	10	0	25-29 years
283	10	m	no	10	1	10-14 years
284	34	f	yes	10	0	30-34 years
285	32	f	no	10	0	30-34 years
286	32	f	yes	10	0	30-34 years
287	13	m	no	10	0	10-14 years
288	24	f	yes	10	0	18-24 years
289	21	f	no	10	0	18-24 years
290	30	f	yes	10	0	30-34 years
291	11	f	no	10	0	10-14 years
292	6	m	no	10	0	5-9 years
293	34	f	yes	10	0	30-34 years
294	26	f	yes	10	0	25-29 years
295	27	f	yes	10	0	25-29 years
296	37	f	yes	10	0	35 and above
297	25	f	yes	11	0	25-29 years
298	1	m	yes	11	0	0-4 years
299	22	f	yes	11	1	18-24 years
300	3	m	no	11	1	0-4 years
301	23	f	no	11	0	18-24 years
302	11	m	yes	11	0	10-14 years
303	28	f	yes	11	0	25-29 years
304	35	f	yes	11	1	35 and above
305	25	f	yes	11	0	25-29 years
306	36	f	no	11	0	35 and above
307	25	f	yes	11	0	25-29 years
308	8	m	yes	11	0	5-9 years
309	15	m	yes	11	0	15-17 years
310	32	f	yes	11	0	30-34 years
311	3	f	no	11	1	0-4 years
312	30	f	no	11	1	30-34 years
313	29	f	yes	11	0	25-29 years
314	15	m	yes	11	0	15-17 years
315	26	f	yes	11	0	25-29 years
316	29	f	yes	11	0	25-29 years
317	6	m	yes	11	0	5-9 years
318	35	f	no	11	0	35 and above
319	16	m	yes	11	0	15-17 years
320	10	m	no	11	0	10-14 years
321	5	f	yes	12	1	5-9 years
322	30	f	yes	12	0	30-34 years
323	38	f	no	12	1	35 and above
324	35	f	yes	12	0	35 and above
325	43	f	yes	12	0	35 and above
326	35	f	yes	12	0	35 and above
327	26	f	yes	12	0	25-29 years
328	6	f	yes	12	0	5-9 years
329	16	f	yes	12	0	15-17 years
330	32	f	yes	12	0	30-34 years
331	31	f	yes	12	0	30-34 years
332	35	f	yes	12	0	35 and above
333	39	f	yes	12	1	35 and above
334	40	f	no	12	1	35 and above
335	31	f	yes	12	0	30-34 years
336	32	f	yes	12	0	30-34 years
337	36	f	yes	12	1	35 and above
338	14	m	no	12	0	10-14 years
339	35	f	no	13	0	35 and above
340	35	f	yes	13	1	35 and above
341	40	f	yes	13	0	35 and above
342	9	f	yes	13	0	5-9 years
343	15	f	yes	13	0	15-17 years
344	18	f	yes	13	0	18-24 years
345	35	f	yes	13	1	35 and above
346	15	m	yes	13	1	15-17 years
347	21	f	yes	13	1	18-24 years
348	28	f	no	13	0	25-29 years
349	5	m	yes	13	1	5-9 years
350	27	f	yes	13	2	25-29 years
351	37	f	yes	13	0	35 and above
352	31	f	yes	13	1	30-34 years
353	33	f	yes	13	1	30-34 years
354	35	f	yes	14	0	35 and above
355	28	f	yes	14	0	25-29 years
356	36	f	no	14	1	35 and above
357	25	f	no	14	1	25-29 years
358	3	m	yes	14	1	0-4 years
359	20	f	yes	14	1	18-24 years
360	38	f	no	14	0	35 and above
361	35	f	yes	14	0	35 and above
362	10	m	yes	14	0	10-14 years
363	38	f	no	14	1	35 and above
364	48	f	no	14	0	35 and above
365	7	m	yes	14	0	5-9 years
366	17	m	yes	14	0	15-17 years
367	40	f	yes	14	0	35 and above
368	32	f	no	15	0	30-34 years
369	7	m	yes	15	0	5-9 years
370	35	f	yes	15	0	35 and above
371	16	m	yes	15	0	15-17 years
372	37	f	yes	15	0	35 and above
373	33	f	yes	15	0	30-34 years
374	31	f	yes	15	1	30-34 years
375	38	f	yes	15	1	35 and above
376	24	f	yes	15	0	18-24 years
377	8	f	no	15	1	5-9 years
378	42	f	no	15	0	35 and above
379	38	f	yes	15	1	35 and above
380	41	f	yes	15	0	35 and above
381	26	f	yes	15	1	25-29 years
382	37	f	yes	16	1	35 and above
383	34	f	yes	16	0	30-34 years
384	37	f	yes	16	0	35 and above
385	34	f	yes	16	1	30-34 years
386	27	f	yes	16	2	25-29 years
387	21	f	yes	16	0	18-24 years
388	34	f	yes	16	1	30-34 years
389	33	f	yes	16	2	30-34 years
390	14	f	yes	16	0	10-14 years
391	30	f	no	16	0	30-34 years
392	37	f	yes	16	0	35 and above
393	8	f	yes	16	0	5-9 years
394	37	f	yes	16	0	35 and above
395	7	m	no	16	2	5-9 years
396	23	f	yes	16	0	18-24 years
397	46	f	yes	16	0	35 and above
398	24	f	yes	16	0	18-24 years
399	9	f	yes	16	0	5-9 years
400	25	f	yes	16	0	25-29 years
401	17	f	yes	17	1	15-17 years
402	31	f	no	17	0	30-34 years
403	31	f	yes	17	0	30-34 years
404	30	f	no	17	0	30-34 years
405	30	f	no	17	0	30-34 years
406	39	f	yes	17	0	35 and above
407	7	m	yes	17	2	5-9 years
408	31	f	yes	17	0	30-34 years
409	9	f	yes	17	1	5-9 years
410	4	m	yes	17	0	0-4 years
411	33	f	yes	17	1	30-34 years
412	34	f	yes	18	0	30-34 years
413	28	f	yes	18	1	25-29 years
414	36	f	yes	18	0	35 and above
415	38	f	yes	18	1	35 and above
416	2	f	yes	18	0	0-4 years
417	35	f	yes	18	0	35 and above
418	37	f	yes	18	0	35 and above
419	19	f	yes	18	1	18-24 years
420	32	f	yes	18	0	30-34 years
421	32	f	no	18	0	30-34 years
422	7	m	yes	18	1	5-9 years
423	23	f	yes	18	1	18-24 years
424	21	f	yes	18	0	18-24 years
425	32	f	yes	18	0	30-34 years
426	38	f	yes	18	0	35 and above
427	34	f	yes	18	1	30-34 years
428	10	m	yes	18	0	10-14 years
